# Supplementary material for: Isolation and Bioassay of a New Terminalone A from Terminalia arjuna
Source: MDPI journal article supplement (doi:10.3390/molecules28031015), 2023-01-19
Supplement: s1 [file s1]

## Supporting Information

### Isolation and Bioassay of a New Terminalone A from *Terminalia arjuna*

**Bushra<sup>1</sup>, Khalil ur Rehman<sup>1\*</sup>, Dilaraz Khan<sup>1</sup>, Abdulrahman A. Almehizia<sup>2</sup>, Ahmed M. Naglah<sup>2</sup>, Asma S. Al-Wasidi<sup>3</sup>, Moamen S. Refat<sup>4</sup>, Mohamed Y. El-Sayed<sup>5</sup>, Hamid Ullah<sup>6</sup>, Shafiullah Khan<sup>1\*</sup>**

<sup>1</sup>Institute of Chemical Sciences, Gomal University, Dera Ismail Khan, KPK, Pakistan

<sup>2</sup>Drug Exploration and Development Chair (DEDC), Department of Pharmaceutical Chemistry, College of Pharmacy, King Saud University, Riyadh 11451, Saudi Arabia

<sup>3</sup>Department of Chemistry, College of Science, Princess Nourah bint Abdulrahman University, Riyadh 11671, Saudi Arabia

<sup>4</sup>Department of Chemistry, College of Science, Taif University, P.O. Box 11099, Taif 21944, Saudi Arabia

<sup>5</sup>Chemistry Department, College of Science, Jouf University, P.O. Box: 2014, Sakaka, Saudi Arabia

<sup>6</sup>Department of Chemistry, Balochistan University of Information Technology, Engineering and Management Sciences, Quetta 87300, Pakistan

**\*Corresponding author Email Address:** [khalilrehmanph.d@gmail.com](mailto:khalilrehmanph.d@gmail.com),

[s.khan@gu.edu.pk](mailto:s.khan@gu.edu.pk);

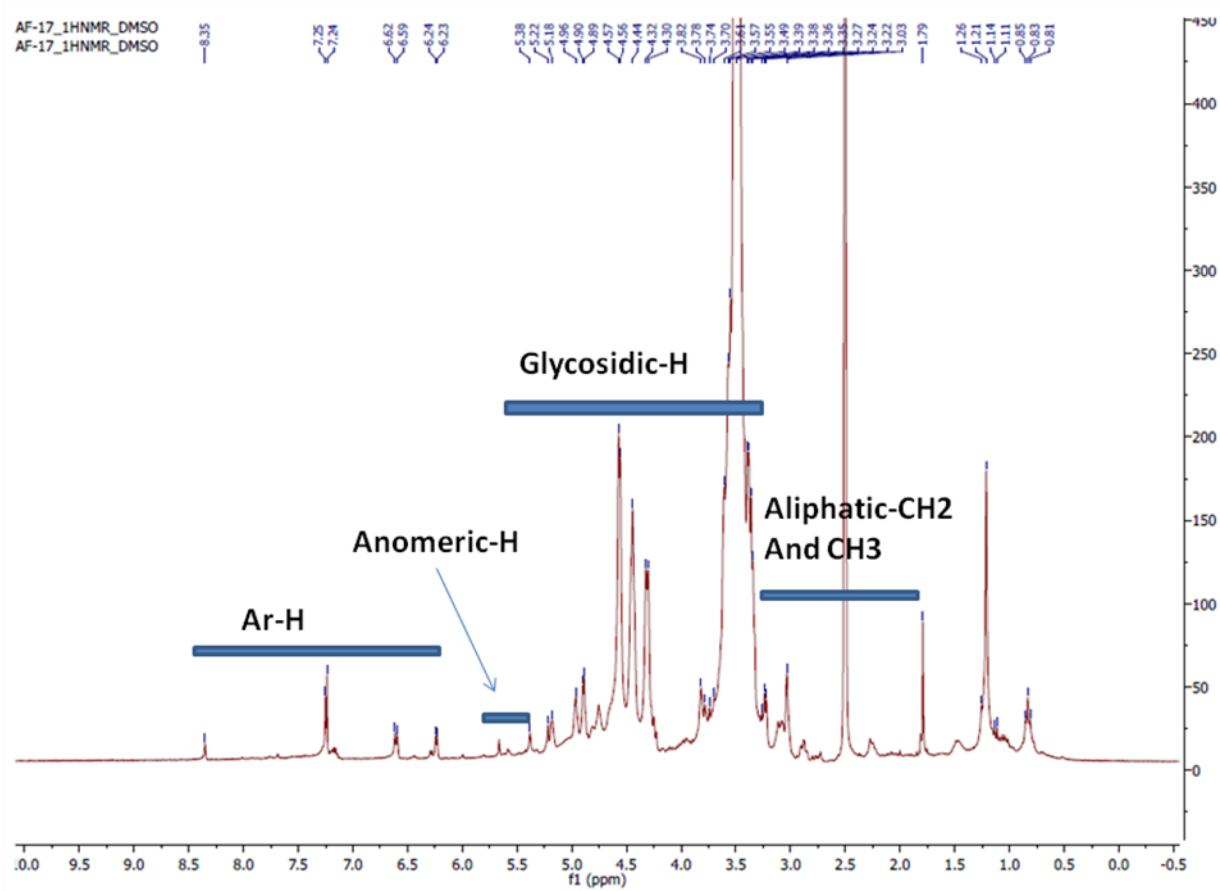

**Figure S1:**  $^1\text{H}$  NMR spectrum of compound **1**

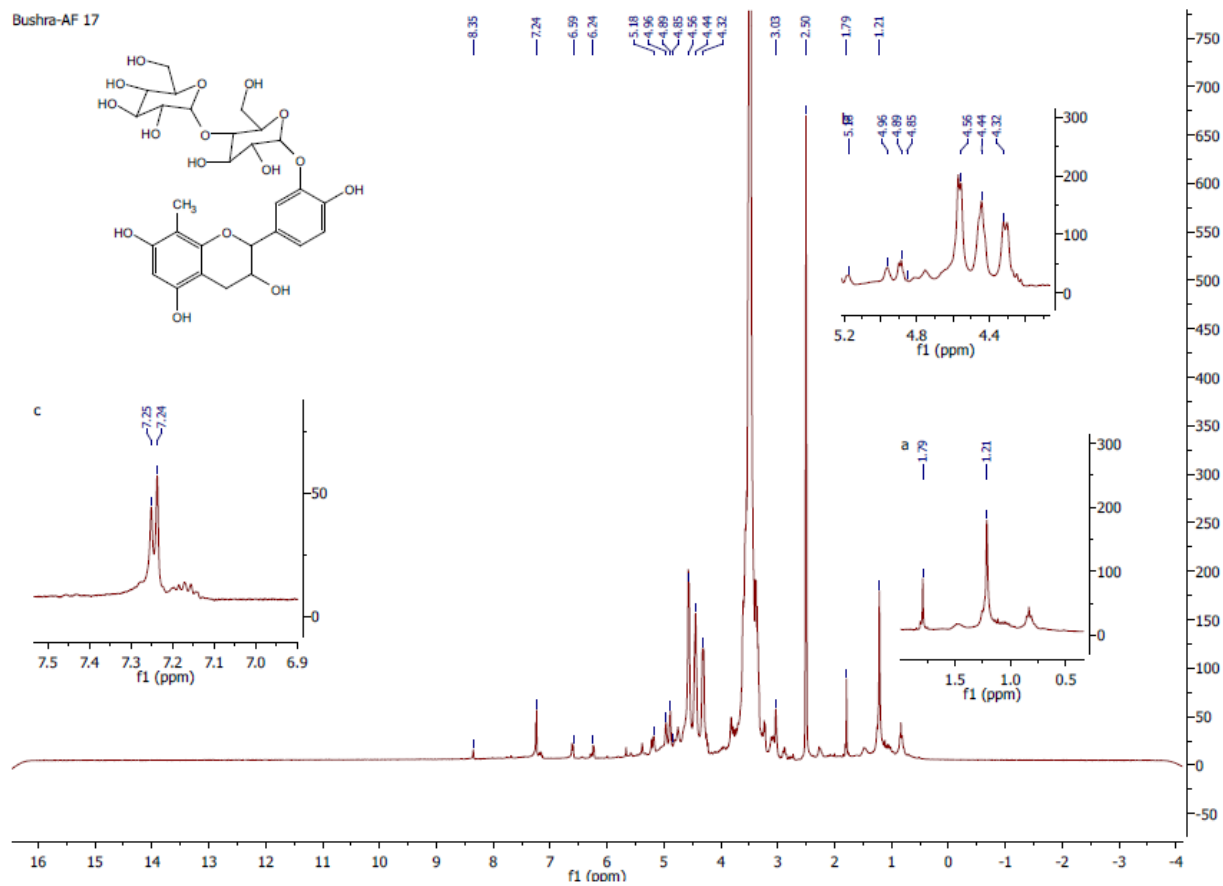

**Figure S2:** Expanded  $^1\text{H}$  NMR spectrum of compound **1**

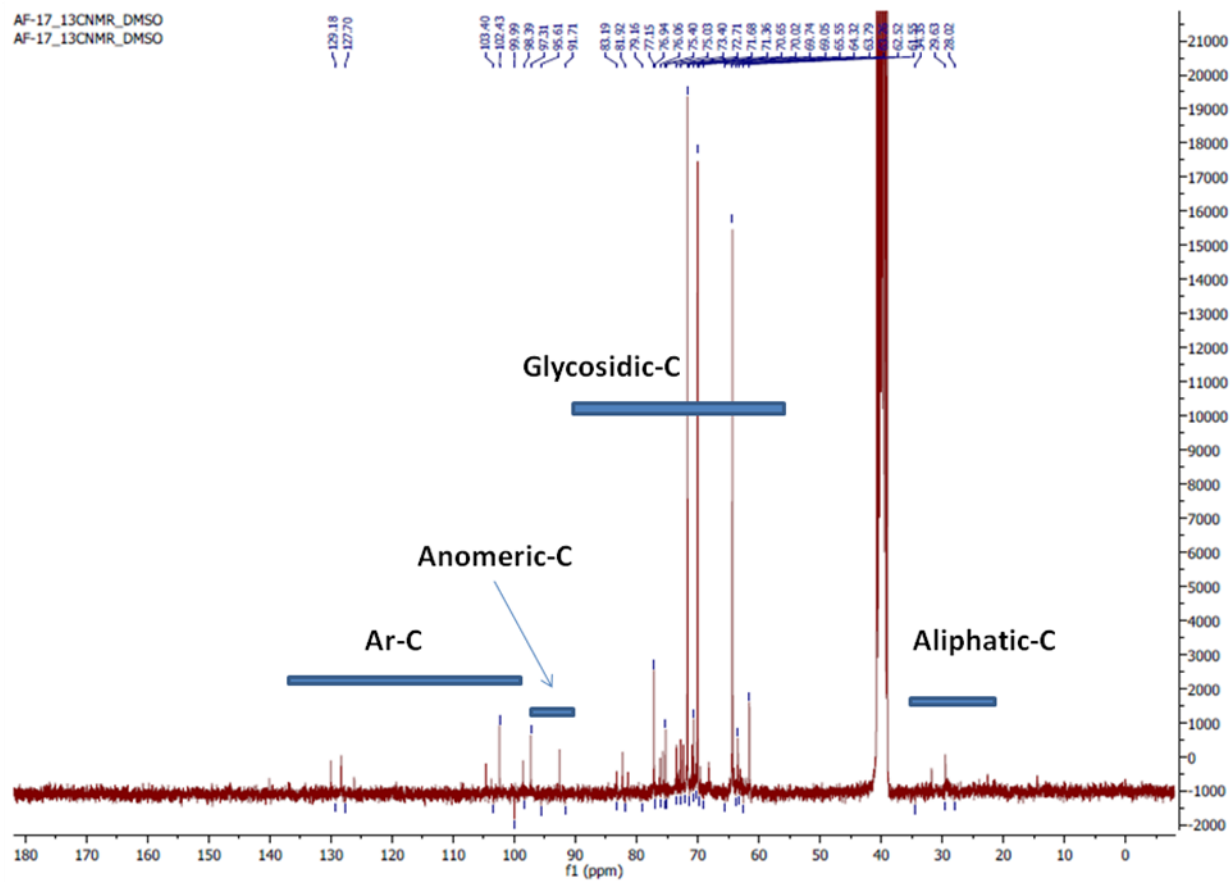

**Figure S3:**  $^{13}\text{C}$  NMR spectrum of compound **1**
